# Supplementary material
Source: Elsevier journal article supplement (https://www.sciencedirect.com/science/article/pii/S1885585721000293)
Supplement: mmc1 [file S1885585721000293:mmc1.doc]

1. APPENDIX. SUPPLEMENTARY DATA

Supplementary DATA to this article can be viewed in the electronic version available at [http://dx.doi.org/10.1016/j.recesp.2020.10.018](doi:10.1016/j.recesp.2020.10.018)

1. Supplementary data

mmc1

References

<BIBL>

<BIB>

1

S Drope F J.

S Schluger F N.

S Cahn F Z.<ET-AL>

AT *The Tobacco Atlas: American Cancer Society and Vital Strategies*

JT Deaths.

D 2018

C Available at: <https://tobaccoatlas.org/topic/deaths/>. Accessed on 26 November 2019

</BIB>

<BIB>

2

National Center for Chronic Disease Prevention and Health Promotion (US) Office on Smoking and Health. The Health Consequences of Smoking—50 Years of Progress: A Report of the Surgeon General. Atlanta: Centers for Disease Control and Prevention; 2014.

</BIB>

<BIB>

3

S Lopez F A.D.

S Collishaw F N.E.

S Piha F T.

AT A descriptive model of the cigarette epidemic in developed countries

JT Tob Control.

V 3

D 1994

P 242-L 247

</BIB>

<BIB>

4

Ministerio de Sanidad Consumo y Bienestar Social. Encuesta Nacional de Salud de España 2017. 2018. Available at: <https://www.mscbs.gob.es/estadEstudios/estadisticas/encuestaNacional/encuesta2017.htm>. Accessed on 21 November 2019.

</BIB>

<BIB>

5

Ministerio de Sanidad Consumo y Bienestar Social. Encuesta Nacional de Salud de España 1987. 1989. Available at: <https://www.mscbs.gob.es/estadEstudios/estadisticas/encuestaNacional/encuesta1987.htm>. Accessed on 21 November 2019.

</BIB>

<BIB>

6

Ministerio de Sanidad Consumo y Bienestar Social. Encuesta Nacional de Salud de España, 2006. 2008. Available at: <https://www.mscbs.gob.es/estadEstudios/estadisticas/encuestaNacional/encuesta2006.htm>. Accessed on 21 November 2019.

</BIB>

<BIB>

7

S Pérez-Ríos F M.

S Schiaffino F A.

S Montes F A.<ET-AL>

AT Smoking-attributable mortality in Spain in 2016

JT Arch Bronconeumol.

V 56

D 2020

P 559-L 563

</BIB>

<BIB>

8

S Rey F J.

S Pérez-Ríos F M.

S Santiago-Pérez F M.I.<ET-AL>

AT Mortalidad atribuida al consumo de tabaco en España: revisión sistemática

JT Gac Sanit.

V 34 Supl Congr

D 2020

P 230

C Available at: <https://static.elsevier.es/miscelanea/congreso_gaceta2020.pdf>

</BIB>

<BIB>

9

S Pérez-Ríos F M.

S Montes F A.

AT Methodologies used to estimate tobacco-attributable mortality: A review

JT BMC Public Health.

V 8

D 2008

P 22

</BIB>

<BIB>

10

Instituto Nacional de Estadística. Encuesta Nacional de Salud de España 2003. Madrid: Ministerio de Sanidad, Servicios Sociales e Igualdad; 2003. Available at: <https://www.mscbs.gob.es/estadEstudios/estadisticas/encuestaNacional/encuesta2011.htm>. Accessed on 21 November 2019.

</BIB>

<BIB>

11

Ministerio de Sanidad Consumo y Bienestar Social. Encuesta Europea de Salud en España 2014. 2017. Available at: <https://www.mscbs.gob.es/estadEstudios/estadisticas/EncuestaEuropea/Enc_Eur_Salud_en_Esp_2014.htm>. Accessed on 21 November 2019.

</BIB>

<BIB>

12

S Thun F M.J.

S Carter F B.D.

S Feskanich F D.<ET-AL>

AT 50-year trends in smoking-related mortality in the United States

JT N Engl J Med.

V 368

D 2013

P 351-L 364

</BIB>

<BIB>

13

Eurostat European Commission. Revision of the European Standard Population Report of Eurostat’s task force. 2013. Available at: <http://ec.europa.eu/eurostat/documents/3859598/5926869/KS-RA-13-028-EN.PDF/e713fa79-1add-44e8-b23d-5e8fa09b3f8f>. Accessed on 29 November 2019.

</BIB>

<BIB>

14

S Pérez-Ríos F M.

S Santiago-Pérez F M.I.

S Caramés F S.C.

S De La Iglesia F B.A.

S Pintos F A.M.

S Vidal F X.H.

AT Mortalidad y años de esperanza de vida perdidos a causa del tabaquismo en personas mayores de 35 años en Galicia en el período 2001-2006

JT Rev Esp Salud Publica.

V 83

D 2009

P 557-L 565

</BIB>

<BIB>

15

S Pérez-Ríos F M.

S Santiago-Pérez F M.I.

S Cerdeira-Caramés F S.<ET-AL>

AT Mortalidad atribuida al consumo de tabaco en Galicia, 1980-2007

JT Med Clin (Barc).

V 137

D 2011

P 247-L 253

</BIB>

<BIB>

16

S Valero Juan F L.

S Carrero Santos F M.

S Nelia Lubián F M.

S Sáenz González F M.

AT Mortalidad atribuible al tabaco en Extremadura

JT Cent Salud.

V 7

D 1999

P 250-L 254

</BIB>

<BIB>

17

S Criado-Álvarez F J.J.

S Morant Ginestar F C.

S De Lucas Veguillas F A.

AT Mortalidad atribuible al consumo de tabaco en los años 1987 y 1997 en Castilla-La Mancha

JT España. Rev Esp Salud Publica.

V 76

D 2002

P 27-L 36

</BIB>

<BIB>

18

S Santos Zarza F E.F.

S Valero Juan F L.F.

S Sáenz González F M.C.

AT Mortality attributable to smoking in Castilla and Leon

JT Aten Primaria.

V 27

D 2001

P 153-L 158

</BIB>

<BIB>

19

S Santana Armas F J.

S Orengo F J.

S Santana Armas F Y.

S Lorenzo F P.

S Serra Majem F L.

AT Mortalidad atribuible al tabaquismo en Canarias

JT Canar Méd.

V 13

D 1998

P 15-L 19

</BIB>

<BIB>

20

S Bello Luján F L.

S Lorenzo Ruano F P.

S Gil Muñoz F M.

S Saavedra Santana F P.

S Serra Majem F L.

AT Evolución de la mortalidad atribuible al tabaco en Canarias (1975-1994)

JT Rev Esp Salud Publica.

V 75

D 2001

P 71-L 80

</BIB>

<BIB>

21

S Zorrilla-Torras F B.

S García-Marín F N.

S Galán-Labaca F I.

S Gandarillas-Grande F A.

AT Smoking attributable mortality in the Community of Madrid: 1992-1998

JT Eur J Public Health.

V 15

D 2005

P 43-L 50

</BIB>

<BIB>

22

Office of the Surgeon General (US); Office on Smoking and Health (US). *The Health Consequences of Smoking: A Report of the Surgeon General*. Atlanta: Centers for Disease Control and Prevention; 2004.

</BIB>

<BIB>

23

Ministerio de Sanidad Consumo y Bienestar Social. Encuesta Nacional de Salud de España, 2001. 2002. Available at: <https://www.mscbs.gob.es/estadEstudios/estadisticas/encuestaNacional/encuestaNac2001/home.htm>. Accessed on 2 May 2020.

</BIB>

<BIB>

24

Ministerio de Sanidad Consumo y Bienestar Social. Encuesta Nacional de Salud de España, 1997. 1999. Available at: <https://www.mscbs.gob.es/estadEstudios/estadisticas/encuestaNacional/encuesta1997.htm>. Accessed on 2 May 2020.

</BIB>

<BIB>

25

Ministerio de Sanidad Consumo y Bienestar Social. Encuesta Nacional de Salud de España, 1993. 1995. Available at: <https://www.mscbs.gob.es/estadEstudios/estadisticas/encuestaNacional/encuesta1993.htm>. Accessed on 2 May 2020.

</BIB>

<BIB>

26

Instituto Nacional de Estadística. Defunciones según la causa de muerte. 2019. Available at: [https://www.ine.es/jaxiT3/Tabla.htm?t=7947](https://www.ine.es/jaxiT3/Tabla.htm%3Ft=7947). Accessed on 4 June 2020.

</BIB>

<BIB>

27

Ministerio de Sanidad, Consumo y Bienestar Social. Consulta interactiva del Sistema Nacional de Salud. Available at: <https://pestadistico.inteligenciadegestion.mscbs.es/publicoSNS/I/mortalidad-por-causa-de-muerte/tasas-brutas-de-mortalidad-a-partir-de-1999-cie-10>. Accessed on 25 September 2020.

</BIB>

<BIB>

28

Ministerio de Sanidad, Servicios Sociales e Igualdad. Muertes atribuibles al consumo de tabaco en España, 2000-2014. 2016. Available at: <https://www.mscbs.gob.es/estadEstudios/estadisticas/estadisticas/estMinisterio/mortalidad/docs/MuertesTabacoEspana2014.pdf>. Accessed on 25 September 2020.

</BIB>

<BIB>

29

S Martín-Sánchez F J.C.

S Bilal F U.

S Clèries F R.<ET-AL>

AT Modelling lung cancer mortality rates from smoking prevalence: Fill in the gap

JT Cancer Epidemiol.

V 49

D 2017

P 19-L 23

</BIB>

<BIB>

30

S Roy F A.

S Rawal F I.

S Jabbour F S.

S Prabhakaran F D.

BT Tobacco and cardiovascular disease: a summary of evidence. In: *Disease Control Priorities, Third Edition (Volume 5): Cardiovascular, Respiratory*, and Related Disorders

PL New York

PN World Bank

D 2017

P 57-L 77

DOI 10.1596/978-1-4648-0518-9_ch4

</BIB>

<BIB>

31

Instituto Nacional de Estadística. Contabilidad Regional de España. Base 2010. Producto Interior Bruto regional año 2017. 2018. Available at: [www.ine.es/infoine](http://www.ine.es/infoine). Accessed on 4 June 2020.

</BIB>

<BIB>

32

S Haeberer F M.

S León-Gómez F I.

S Pérez-Gómez F B.<ET-AL>

AT Social inequalities in tobacco-attributable mortality in Spain, The intersection between age, sex and educational level

JT PLoS One.

V 15

D 2020

C e0239866

</BIB>

<BIB>

33

S Higgins F S.T.

S Kurti F A.N.

S Redner F R.<ET-AL>

AT A literature review on prevalence of gender differences and intersections with other vulnerabilities to tobacco use in the United States, 2004-2014

JT Prev Med.

V 80

D 2015

P 89-L 100

</BIB>

<BIB>

34

S Smith F P.H.

S Bessette F A.J.

S Weinberger F A.H.

S Sheffer F C.E.

S McKee F S.A.

AT Sex/gender differences in smoking cessation: A review

JT Prev Med.

V 92

D 2016

P 135-L 140

</BIB>

<BIB>

35

S Villalbi F J.

S Suelves F J.

S Martínez F C.

S Valverde F A.

S Cabezas F C.

S Fernández F E.

AT El control del tabaquismo en España: situación actual y prioridades

JT Rev Esp Salud Publica.

V 91

D 2019

P e1-L e6

</BIB>

<BIB>

36

S Jain F R.B.

AT Analysis of self-reported versus biomarker based smoking prevalence: methodology to compute corrected smoking prevalence rates

JT Biomarkers.

V 22

D 2017

P 476-L 487

</BIB>

<BIB>

37

S Connor Gorber F S.

S Schofield-Hurwitz F S.

S Hardt F J.

S Levasseur F G.

S Tremblay F M.

AT The accuracy of self-reported smoking: A systematic review of the relationship between self-reported and cotinine-assessed smoking status

JT Nicotine Tob Res.

V 11

D 2009

P 12-L 24

</BIB>

<BIB>

38

S Ma F J.

S Siegel F R.L.

S Jacobs F E.J.

S Jemal F A.

AT Smoking-attributable mortality by State in 2014

JT U.S. Am J Prev Med.

V 54

D 2018

P 661-L 670

</BIB>

<BIB>

39

S Thun F M.J.

S Apicella F L.F.

S Henley F S.J.

AT Smoking vs other risk factors as the cause of smoking-attributable deaths, Confounding in the courtroom

JT J Am Med Assoc.

V 284

D 2000

P 706-L 712

</BIB>

</BIBL>
